# Supplementary material
Source: HighWire-hosted journal article supplement (https://bmjopen.bmj.com/content/9/8/e029704)
Supplement: inline-supplementary-material-1 [file inline-supplementary-material-1.pdf]

**Supplementary file 1. List of journals that were considered Core Clinical Journals in 2009 and in 2018 (X stands for those that were included in a given year, and 0 for those that were not included)**

| #  | Journal Title (NLM-Abbreviation) | Core Clinical Journal in 2009 | Core Clinical Journal in 2018 |
|----|----------------------------------|-------------------------------|-------------------------------|
| 1  | Acad Med                         | x                             | x                             |
| 2  | Am Fam Physician                 | x                             | x                             |
| 3  | Am Heart J                       | x                             | x                             |
| 4  | Am J Cardiol                     | x                             | x                             |
| 5  | Am J Clin Nutr                   | x                             | x                             |
| 6  | Am J Clin Pathol                 | x                             | x                             |
| 7  | Am J Med                         | x                             | x                             |
| 8  | Am J Med Sci                     | x                             | x                             |
| 9  | Am J Nurs                        | x                             | x                             |
| 10 | Am J Obstet Gynecol              | x                             | x                             |
| 11 | Am J Ophthalmol                  | x                             | x                             |
| 12 | Am J Pathol                      | x                             | x                             |
| 13 | Am J Phys Med Rehabil            | x                             | x                             |
| 14 | Am J Psychiatry                  | x                             | x                             |
| 15 | Am J Public Health               | x                             | x                             |
| 16 | Am J Respir Crit Care Med        | x                             | x                             |
| 17 | Am J Roentgenol                  | x                             | x                             |
| 18 | Am J Surg                        | x                             | x                             |
| 19 | Am J Trop Med Hyg                | x                             | x                             |
| 20 | Anaesthesia                      | x                             | x                             |
| 21 | Anesth Analg                     | x                             | x                             |
| 22 | Anesthesiology                   | x                             | x                             |
| 23 | Ann Emerg Med                    | x                             | x                             |
| 24 | Ann Intern Med                   | x                             | x                             |
| 25 | Ann Oto Rhinol Laryn             | x                             | x                             |
| 26 | Ann Surg                         | x                             | x                             |

|    |                                 |   |   |
|----|---------------------------------|---|---|
| 27 | Ann Thorac Surg                 | x | x |
| 28 | Arch Dermatol                   | x | o |
| 29 | Arch Dis Child                  | x | x |
| 30 | Arch Dis Child-Fetal            | x | x |
| 31 | Arch Environ Occup H            | x | x |
| 32 | Arch Gen Psychiatry             | x | o |
| 33 | Arch Intern Med                 | x | o |
| 34 | Arch Neurol-Chicago             | x | o |
| 35 | Arch Ophthalmol                 | x | o |
| 36 | Arch Otolaryngol Head Neck Surg | x | o |
| 37 | Arch Pathol Lab Med             | x | x |
| 38 | Arch Pediatr Adolesc Med        | x | o |
| 39 | Arch Phys Med Rehabil           | x | x |
| 40 | Arch Surg                       | x | o |
| 41 | Arthritis Rheum                 | x | x |
| 42 | BJOG                            | x | x |
| 43 | Blood                           | x | x |
| 44 | BMJ                             | x | x |
| 45 | Bone Joint J                    | o | x |
| 46 | Br J Radiol                     | o | x |
| 47 | Br J Surg                       | x | x |
| 48 | Brain                           | x | x |
| 49 | CA Cancer J Clin                | x | x |
| 50 | Cancer                          | x | x |
| 51 | Chest                           | x | x |
| 52 | Circulation                     | x | x |
| 53 | Clin Orthop Relat Res           | x | x |
| 54 | Clin Pediatr (Phila)            | x | x |
| 55 | Clin Pharmacol Ther             | x | x |
| 56 | Clin Toxicol (Phila)            | x | x |

|    |                                  |   |   |
|----|----------------------------------|---|---|
| 57 | CMAJ                             | x | x |
| 58 | Crit Care Med                    | x | x |
| 59 | Curr Probl Surg                  | x | x |
| 60 | Diabetes                         | x | x |
| 61 | Dig Dis Sci                      | x | x |
| 62 | Dis Mon                          | x | x |
| 63 | Endocrinology                    | x | x |
| 64 | Gastroenterology                 | x | x |
| 65 | Geriatrics                       | x | o |
| 66 | Gut                              | x | x |
| 67 | Heart                            | x | x |
| 68 | Heart Lung                       | x | x |
| 69 | Hosp Health Netw                 | x | o |
| 70 | Hosp Pract (1995)                | o | x |
| 71 | J Allergy Clin Immunol           | x | x |
| 72 | J Am Coll Cardiol                | x | x |
| 73 | J Am Coll Surg                   | x | x |
| 74 | J Am Diet Assoc                  | x | o |
| 75 | J Bone Joint Surg Am             | x | x |
| 76 | J Bone Joint Surg Br             | x | o |
| 77 | J Clin Endocrinol Metab          | x | x |
| 78 | J Clin Invest                    | x | x |
| 79 | J Clin Pathol                    | x | x |
| 80 | J Fam Pract                      | x | x |
| 81 | J Gerontol A Biol Sci Med Sci    | x | x |
| 82 | J Gerontol B Psychol Sci Soc Sci | x | x |
| 83 | J Immunol                        | x | x |
| 84 | J Infect Dis                     | x | x |
| 85 | J Laryngol Otol                  | x | x |
| 86 | J Nerv Ment Dis                  | x | x |

|     |                                 |   |   |
|-----|---------------------------------|---|---|
| 87  | J Neurosurg                     | x | x |
| 88  | J Nurs Adm                      | x | x |
| 89  | J Oral Maxillofac Surg          | x | x |
| 90  | J Pediatr                       | x | x |
| 91  | J Acad Nutr Diet                | o | x |
| 92  | J Thorac Cardiovasc Surg        | x | x |
| 93  | J Trauma                        | x | o |
| 94  | J Trauma Acute Care Surg        | o | x |
| 95  | J Urol                          | x | x |
| 96  | JAMA                            | x | x |
| 97  | JAMA Dermatol                   | o | x |
| 98  | JAMA Intern Med                 | o | x |
| 99  | JAMA Neurol                     | o | x |
| 100 | JAMA Ophthalmol                 | o | x |
| 101 | JAMA Otolaryngol Head Neck Surg | o | x |
| 102 | JAMA Pediatr                    | o | x |
| 103 | JAMA psychiatry                 | o | x |
| 104 | JAMA Surg                       | o | x |
| 105 | Lancet                          | x | x |
| 106 | Mayo Clin Proc                  | x | x |
| 107 | Med Clin North Am               | x | x |
| 108 | Med Lett Drugs Ther             | x | x |
| 109 | Medicine (Baltimore)            | x | x |
| 110 | N Engl J Med                    | x | x |
| 111 | Neurology                       | x | x |
| 112 | Nurs Clin North Am              | x | x |
| 113 | Nurs Outlook                    | x | x |
| 114 | Nurs Res                        | x | x |
| 115 | Obstet Gynecol                  | x | x |
| 116 | Orthop Clin North Am            | x | x |

|     |                       |   |   |
|-----|-----------------------|---|---|
| 117 | Pediatr Clin North Am | x | x |
| 118 | Pediatrics            | x | x |
| 119 | Phys Ther             | x | x |
| 120 | Plast Reconstr Surg   | x | x |
| 121 | Postgrad Med          | x | x |
| 122 | Prog Cardiovasc Dis   | x | x |
| 123 | Public Health Rep     | x | x |
| 124 | Radiol Clin North Am  | x | x |
| 125 | Radiology             | x | x |
| 126 | Rheumatology (Oxford) | x | x |
| 127 | South Med J           | x | x |
| 128 | Surg Clin North Am    | x | x |
| 129 | Surgery               | x | x |
| 130 | Transl Res            | x | x |
| 131 | Urol Clin North Am    | x | x |
